# Supplementary material
Source: PubMed Central journal article supplement (PMC6534275)
Supplement: NIHMS1525760-supplement-MAJOR_RESOURCE_TABLE.pdf [file NIHMS1525760-supplement-MAJOR_RESOURCE_TABLE.pdf]

**Major Resources Tables - ATVB/2018/311894R1 (Akinkuolie *at al.*)**

**Animals (in vivo studies)**

| Species | Vendor or Source | Background Strain | Sex |
|---------|------------------|-------------------|-----|
| none    |                  |                   |     |
|         |                  |                   |     |
|         |                  |                   |     |

**Animal breeding**

|                 | Species | Vendor or Source | Background Strain | Other Information |
|-----------------|---------|------------------|-------------------|-------------------|
| Parent - Male   |         |                  |                   |                   |
| Parent - Female |         |                  |                   |                   |

**Antibodies**

| Target antigen | Vendor or Source | Catalog # | Working concentration | Lot # (preferred but not required) |
|----------------|------------------|-----------|-----------------------|------------------------------------|
| *              |                  |           |                       |                                    |
|                |                  |           |                       |                                    |

\*sPLA2-IIA was measured at Quest Diagnostics Nichols Institute (San Juan Capistrano, CA) with a commercially available enzyme immunoassay (Cayman assay; Cayman Chemical Co. Ann Arbor MI) based on a double-antibody sandwich technique that is specific for sPLA2-IIA.

**Cultured Cells**

| Name | Vendor or Source | Sex (F, M, or unknown) |
|------|------------------|------------------------|
| none |                  |                        |
|      |                  |                        |
|      |                  |                        |
