# Supplementary material
Source: PubMed Central journal article supplement (PMC6534275)
Supplement: NIHMS1525760-supplement-Supplemental_Material.pdf [file NIHMS1525760-supplement-Supplemental_Material.pdf]

**Group IIA Secretory Phospholipase A<sub>2</sub> and Incident Cardiovascular Disease:  
An Analysis from the JUPITER Trial**

Akintunde O. Akinkuolie,\* Patrick R. Lawler,\* Audrey Y. Chu, Michael Caulfield, Jianying Mu, Bo  
Ding, Fredrik Nyberg, Robert J. Glynn, Paul M Ridker, Eva Hurt-Camejo, Daniel I. Chasman,  
Samia Mora

**Supplemental Material**

## Contents

- Page 3 Supplemental Table I. Clinical characteristics of participants in the JUPITER sPLA<sub>2</sub>-IIA cohort and overall study population
- Page 4 Supplemental Table II. Spearman correlation coefficients of sPLA<sub>2</sub>-IIA with other variables
- Page 5 Supplemental Table III. Median (25<sup>th</sup> to 75<sup>th</sup> percentile) concentrations of sPLA<sub>2</sub>-IIA and hsCRP by randomized treatment group
- Page 6 Supplemental Table IV. Association between baseline sPLA<sub>2</sub>-IIA and events among participants randomized to placebo, incidence rates and hazard ratios with 95% confidence intervals.
- Page 8 Supplemental Table V. Association between baseline sPLA<sub>2</sub>-IIA and events among participants randomized to rosuvastatin, incidence rates and hazard ratios with 95% confidence intervals.
- Page 10 Supplemental Table VI. SNPs with genome-wide significance for sPLA<sub>2</sub>-IIA<sub>mass</sub> and their association with incident CVD
- Page 12 Supplemental Table VII. Association of top three *PLA2G2A* variants with cardiovascular risk factors
- Page 13 Supplemental Table VIII. Comparison between key factors relating to study design, population, and results between the current study and a prior study in EPIC-Norfolk (Boekholdt *et al. Arterioscler Thromb Vasc Biol.* 2005;25:839-846.).

**Supplemental Table I.** Clinical characteristics of participants in the JUPITER sPLA<sub>2</sub>-IIA cohort and overall study population

| Characteristics                                      | sPLA <sub>2</sub> -IIA Cohort<br>(N= 11,269) | Overall Cohort<br>(N = 17,802) |
|------------------------------------------------------|----------------------------------------------|--------------------------------|
| Age, years                                           | 66 (60 – 71)                                 | 66 (60 – 71)                   |
| Female Sex                                           | 4187 (37)                                    | 6801 (38)                      |
| Rosuvastatin group                                   | 5624 (50)                                    | 8901 (50)                      |
| Race or ethnic group                                 |                                              |                                |
| White                                                | 9026 (80)                                    | 12683 (71)                     |
| Black                                                | 969 (8.6)                                    | 2224 (12.5)                    |
| Asian                                                | 171 (1.5)                                    | 283 (1.6)                      |
| Hispanic                                             | 999 (8.8)                                    | 2261 (12.7)                    |
| Other or unknown                                     | 102 (1)                                      | 349 (2)                        |
| Body mass index, kg/m <sup>2</sup>                   | 28 (25 – 32)                                 | 28 (25 – 32)                   |
| Systolic blood pressure, mm Hg                       | 134 (124 – 146)                              | 134 (124 – 145)                |
| Diastolic blood pressure, mm Hg                      | 80 (75 – 86)                                 | 80 (75 – 87)                   |
| Current smoker                                       | 1760 (16)                                    | 2820 (16)                      |
| Family history of premature coronary disease         | 1398 (12)                                    | 2045 (12)                      |
| Metabolic syndrome                                   | 4351 (39)                                    | 7375 (42)                      |
| Aspirin use                                          | 1951 (17)                                    | 2958 (17)                      |
| High-sensitivity C-reactive protein, mg/L            | 4.2 (2.8 – 6.9)                              | 4.3 (2.9 – 7.1)                |
| sPLA <sub>2</sub> -IIA, ng/mL                        | 3.81 (2.49 – 6.03)                           | -----                          |
| low density lipoprotein -cholesterol, mg/dL          | 109 (94 – 119)                               | 108 (94 – 119)                 |
| high density lipoprotein -cholesterol, mg/dL         | 50 (41 – 60)                                 | 49 (40 – 60)                   |
| Triglycerides, mg/dL                                 | 116 (84 – 164)                               | 118 (85 – 169)                 |
| Total cholesterol, mg/dL                             | 186 (170 – 200)                              | 185 (169 – 200)                |
| Glucose, mg/dL                                       | 94 (88 – 101)                                | 94 (88 – 102)                  |
| Glycated hemoglobin, %                               | 5.7 (5.4 – 5.9)                              | 5.7 (5.5 – 5.9)                |
| GFR, ml/min/1.73 m <sup>2</sup> of body surface area | 74 (65 – 84)                                 | 74 (65 – 84)                   |

The values states are median (25<sup>th</sup> to 75<sup>th</sup> percentile) or n (%). Percentages may not add up because of rounding off.

sPLA<sub>2</sub>-IIA indicates group IIA secretory phospholipases A<sub>2</sub>;GFR, glomerular filtration rate.

**Supplemental Table II.** Spearman correlation coefficients of sPLA<sub>2</sub>-IIA mass with other variables

|                                      | Baseline             | On-treatment         |
|--------------------------------------|----------------------|----------------------|
|                                      | Spearman coefficient | Spearman coefficient |
| Age                                  | 0.21                 | 0.19                 |
| Body mass index                      | 0.09                 | 0.11                 |
| Systolic blood pressure              | 0.04                 | -0.03                |
| Diastolic blood pressure             | -0.03                | -0.07                |
| High-sensitivity C-reactive protein  | 0.31                 | 0.38                 |
| Low density lipoprotein-cholesterol  | -0.04                | 0.05                 |
| High density lipoprotein-cholesterol | 0.11                 | 0.02                 |
| Triglycerides                        | -0.03                | 0.06                 |
| Total cholesterol                    | 0.02                 | 0.07                 |
| Apolipoprotein B                     | -0.04                | 0.08                 |
| Apolipoprotein A-I                   | 0.09                 | -0.009               |
| LpPLA <sub>2</sub> mass              | 0.01                 | 0.02                 |
| LpPLA <sub>2</sub> activity          | -0.17                | -0.02                |
| Glucose                              | -0.05                | -0.04                |
| Glycated hemoglobin                  | 0.14                 | 0.16                 |
| Glomerular filtration rate           | -0.12                | -0.16                |

On-treatment biomarkers were assessed at the twelve-month visit (except for glucose and glycated hemoglobin, assessed at twenty-four months) within the rosuvastatin subgroup (n=4806). sPLA<sub>2</sub>-IIA indicates group IIA secretory phospholipases A<sub>2</sub>; LpPLA<sub>2</sub>, lipoprotein associated phospholipases A<sub>2</sub>. All correlations were statistically significant (P < 0.05) except for total cholesterol and LpPLA<sub>2</sub> mass in the baseline; and high density lipoprotein cholesterol and apolipoprotein A-I in the on-treatment analyses.

**Supplemental Table III.** Median (25<sup>th</sup> to 75<sup>th</sup> percentile) concentrations of sPLA<sub>2</sub>-IIA and hsCRP by randomized treatment group

|                               |              | Baseline <sup>*</sup> | Year 1 <sup>*</sup> | Change <sup>†</sup> | % Change       |
|-------------------------------|--------------|-----------------------|---------------------|---------------------|----------------|
| sPLA <sub>2</sub> -IIA, ng/ml | Placebo      | 3.8 (2.5, 6.0)        | 2.3 (1.4, 4.0)      | -1.3 (-2.4, -0.5)   | -38 (-56, -15) |
|                               | Rosuvastatin | 3.9 (2.5, 6.2)        | 2.1 (1.3, 3.6)      | -1.6 (-2.9, -0.7)   | -46 (-60, -26) |
| hsCRP, mg/L                   | Placebo      | 4.2 (2.8, 6.9)        | 3.4 (1.9, 6.1)      | -0.8 (-2.3, 0.8)    | -20 (-50, 21)  |
|                               | Rosuvastatin | 4.1 (2.8, 6.8)        | 2.2 (1.2, 4.2)      | -1.7 (-3.4, -0.6)   | -48 (-69, -16) |

Values obtained from individuals with both baseline and 1 year measurements (n=9 620). sPLA<sub>2</sub>-IIA indicates group IIA secretory phospholipases A<sub>2</sub>;hsCRP, high-sensitivity C-reactive protein. <sup>\*</sup>*P* values from the Wilcoxon signed rank test comparing baseline and year 1 values were statistically significant (*P* <0.0001) <sup>†</sup>*P* values from the Wilcoxon rank sum test comparing the change among the rosuvastatin group with the change among the placebo group were <0.0001.

**Supplementary Table IV.** Incidence rates and hazard ratios with 95% confidence intervals for baseline sPLA<sub>2</sub>-IIA mass levels and cardiovascular events among participants randomly allocated to placebo

|                                              | Quartile 1          | Quartile 2                    | Quartile 3                     | Quartile 4                     | <i>P</i> for trend | HR per 1-SD*        | <i>P</i> -value |
|----------------------------------------------|---------------------|-------------------------------|--------------------------------|--------------------------------|--------------------|---------------------|-----------------|
| sPLA <sub>2</sub> -IIA levels (ng/mL)        | ≤ 2.49              | 2.50 – 3.81                   | 3.82 – 6.03                    | >6.03                          |                    |                     |                 |
| <b>Primary Endpoint</b>                      |                     |                               |                                |                                |                    |                     |                 |
| # of events / N                              | 46/1377             | 45/1465                       | 57/1431                        | 56/1372                        |                    | 204/5645            |                 |
| Incidence rate, per 100 person-years         | 1.64<br>(1.23-2.18) | 1.48<br>(1.11-1.98)           | 1.90<br>(1.47-2.46)            | 2.01<br>(1.55-2.60)            |                    |                     |                 |
| Model 1                                      | 1.00                | 0.93<br>(0.62-1.40)<br>P=0.73 | 1.24<br>(0.83-1.83)<br>P=0.29  | 1.41<br>(0.93-2.13)<br>P=0.10  | 0.049              | 1.20<br>(1.04-1.40) | 0.02            |
| Model 2                                      | 1.00                | 0.89<br>(0.58-1.34)<br>P=0.57 | 1.15<br>(0.77-1.72)<br>P=0.49  | 1.35<br>(0.89-2.04)<br>P=0.16  | 0.09               | 1.19<br>(1.02-1.38) | 0.03            |
| Model 3                                      | 1.00                | 0.88<br>(0.58-1.34)<br>P=0.55 | 1.14<br>(0.76-1.71)<br>P=0.53  | 1.31<br>(0.85-2.03)<br>P=0.22  | 0.13               | 1.18<br>(1.00-1.39) | 0.047           |
| <b>Primary Endpoint Plus Total Mortality</b> |                     |                               |                                |                                |                    |                     |                 |
| # of events / N                              | 66/ 1377            | 74/ 1465                      | 93/1431                        | 94/1372                        |                    | 327/5645            |                 |
| Incidence rate, per 100 person-years         | 2.35<br>(1.85-2.98) | 2.43<br>(1.94-3.05)           | 3.10<br>(2.53-3.78)            | 3.31<br>(2.72-4.04)            |                    |                     |                 |
| Model 1                                      | 1.00                | 1.06<br>(0.76-1.48)<br>P=0.72 | 1.39<br>(1.01-1.91)<br>P=0.046 | 1.58<br>(1.13-2.20)<br>P=0.007 | 0.002              | 1.26<br>(1.13-1.42) | <0.0001         |
| Model 2                                      | 1.00                | 1.03<br>(0.73-1.43)<br>P=0.88 | 1.30<br>(0.94-1.80)<br>P=0.11  | 1.48<br>(1.06-2.07)<br>P=0.02  | 0.008              | 1.24<br>(1.10-1.39) | 0.0004          |
| Model 3                                      | 1.00                | 1.00<br>(0.72-1.40)<br>P=1.00 | 1.23<br>(0.88-1.70)<br>P=0.22  | 1.30<br>(0.92-1.85)<br>P=0.14  | 0.08               | 1.18<br>(1.03-1.36) | 0.01            |

Model One: Adjusted for age, gender, and race.

Model Two: Adjusted for age, gender, race, smoking, family history of premature atherosclerosis, body mass index, systolic blood pressure, fasting glucose, high density lipoprotein-cholesterol, low density lipoprotein -cholesterol, and ln triglycerides

Model Three: Adjusted for age, gender, race, smoking, family history of premature atherosclerosis, body mass index, systolic blood pressure, fasting glucose, high density lipoprotein-cholesterol, low density lipoprotein -cholesterol, ln triglycerides, ln high-sensitivity C-reactive protein. sPLA<sub>2</sub>-IIA indicates group IIA secretory phospholipases A2; HR, hazard ratio; SD, standard deviation; CVD, cardiovascular disease.  $P_{\text{Interaction}}$  by randomization treatment assignment were >0.05.\*Hazard ratios are expressed per 1-SD increment in ln sPLA<sub>2</sub>-IIA

**Supplementary Table V.** Incidence rates and hazard ratios with 95% confidence intervals for baseline sPLA<sub>2</sub>-IIA mass levels and cardiovascular events among participants randomly allocated to rosuvastatin

|                                              | Quartile 1          | Quartile 2                    | Quartile 3                    | Quartile 4                     | <i>P</i> for trend | HR per 1-SD*         | <i>P</i> -value |
|----------------------------------------------|---------------------|-------------------------------|-------------------------------|--------------------------------|--------------------|----------------------|-----------------|
| sPLA <sub>2</sub> -IIA levels (ng/mL)        | ≤ 2.49              | 2.50 – 3.81                   | 3.82 – 6.03                   | >6.03                          |                    |                      |                 |
| <b>Primary Endpoint</b>                      |                     |                               |                               |                                |                    |                      |                 |
| # of events / N                              | 24/1446             | 24/1350                       | 25/1396                       | 36/1432                        |                    | 109/5624             |                 |
| Incidence rate, per 100 person-years         | 0.81<br>(0.54-1.21) | 0.85<br>(0.57-1.27)           | 0.85<br>(0.57-1.25)           | 1.25<br>(0.90-1.73)            |                    |                      |                 |
| Model 1                                      | 1.00                | 1.09<br>(0.62-1.93)<br>P=0.76 | 1.14<br>(0.64-2.01)<br>P=0.66 | 1.74<br>(1.01-3.00)<br>P=0.047 | 0.05               | 1.23<br>(1.002-1.51) | 0.048           |
| Model 2                                      | 1.00                | 1.18<br>(0.66-2.11)<br>P=0.59 | 1.21<br>(0.67-2.16)<br>P=0.53 | 1.88<br>(1.07-3.31)<br>P=0.03  | 0.03               | 1.26<br>(1.02-1.55)  | 0.03            |
| Model 3                                      | 1.00                | 1.14<br>(0.64-2.05)<br>P=0.65 | 1.13<br>(0.63-2.04)<br>P=0.67 | 1.63<br>(0.91-2.92)<br>P=0.10  | 0.11               | 1.17<br>(0.94-1.46)  | 0.15            |
| <b>Primary Endpoint Plus Total Mortality</b> |                     |                               |                               |                                |                    |                      |                 |
| # of events / N                              | 48/1446             | 43/1350                       | 47/1396                       | 64/1432                        |                    | 202/5624             |                 |
| Incidence rate, per 100 person-years         | 1.62<br>(1.23-2.15) | 1.53<br>(1.13-2.05)           | 1.59<br>(1.20-2.11)           | 2.22<br>(1.74-2.83)            |                    |                      |                 |
| Model 1                                      | 1.00                | 0.96<br>(0.64-1.45)<br>P=0.84 | 1.04<br>(0.69-1.56)<br>P=0.86 | 1.45<br>(0.98-2.17)<br>P=0.07  | 0.06               | 1.25<br>(1.08-1.45)  | 0.003           |
| Model 2                                      | 1.00                | 1.01<br>(0.67-1.54)<br>P=0.96 | 1.08<br>(0.71-1.64)<br>P=0.72 | 1.48<br>(0.99-2.22)<br>P=0.06  | 0.05               | 1.25<br>(1.07-1.45)  | 0.004           |
| Model 3                                      | 1.00                | 0.98<br>(0.64-1.49)<br>P=0.92 | 1.00<br>(0.66-1.53)<br>P=0.99 | 1.25<br>(0.82-1.90)<br>P=0.30  | 0.30               | 1.16<br>(0.99-1.35)  | 0.07            |

Model One: Adjusted for age, gender, and race.

Model Two: Adjusted for age, gender, race, smoking, family history of premature atherosclerosis, body mass index, systolic blood pressure, fasting glucose, high density lipoprotein-cholesterol, low density lipoprotein -cholesterol, and ln triglycerides



Model Three: Adjusted for age, gender, race, smoking, family history of premature atherosclerosis, body mass index, systolic blood pressure, fasting glucose, high density lipoprotein-cholesterol, low density lipoprotein -cholesterol, ln triglycerides, ln high-sensitivity C-reactive protein. sPLA<sub>2</sub>-IIA indicates group IIA secretory phospholipases A<sub>2</sub>; HR, hazard ratio; SD, standard deviation; CVD, cardiovascular disease.  $P_{\text{Interaction}}$  by randomization treatment assignment were >0.05.\*Hazard ratios are expressed per 1-SD increment in ln sPLA<sub>2</sub>-IIA

**Supplemental Table VI. SNPs with genome-wide significance for sPLA<sub>2</sub>-IIA mass and their association with incident CVD**

| Chr | Gene                   | SNP         | BP       | A1 | MAF  | A2 | $\beta$ (SE) | R2    | P Value   | HR (95% CI)      | P Value |
|-----|------------------------|-------------|----------|----|------|----|--------------|-------|-----------|------------------|---------|
| 1   | <i>PLA2G2A</i>         | rs11573156* | 20178733 | G  | 0.23 | C  | 2.31 (0.06)  | 0.277 | 5.1E-472  | 1.11 (0.89-1.38) | 0.34    |
| 1   | <i>PLA2G2A</i>         | rs2307246†  | 20177444 | T  | 0.23 | C  | 2.27 (0.06)  | 0.261 | 3.2 E-441 | 1.12 (0.90-1.39) | 0.32    |
| 1   | <i>PLA2G2A</i>         | rs4744      | 20177513 | T  | 0.23 | C  | 2.27 (0.06)  | 0.262 | 1.1 E-441 | 1.11 (0.89-1.38) | 0.37    |
| 1   | <i>PLA2G2E/A</i>       | rs10916679  | 20159150 | A  | 0.27 | C  | 1.60 (0.06)  | 0.133 | 3.2E-210  | 1.11 (0.90-1.37) | 0.33    |
| 1   | <i>PLA2G2E/A</i>       | rs6672057   | 20166378 | T  | 0.46 | C  | 1.23 (0.05)  | 0.103 | 2.7E-160  | 1.05 (0.87-1.27) | 0.59    |
| 1   | <i>PLA2G5</i>          | rs17354650  | 20262909 | T  | 0.28 | C  | 1.28 (0.06)  | 0.100 | 3.5E-155  | 1.23 (1.00-1.50) | 0.05    |
| 1   | <i>PLA2G2E/A</i>       | rs12023742† | 20164593 | A  | 0.38 | C  | -1.15 (0.05) | 0.090 | 3.6E-138  | 1.06 (0.88-1.29) | 0.52    |
| 1   | <i>PLA2G5</i>          | rs2020887   | 20283919 | T  | 0.35 | C  | 0.99 (0.05)  | 0.062 | 9.2E-95   | 1.13 (0.93-1.37) | 0.21    |
| 1   | <i>PLA2G5/2D</i>       | rs4655155   | 20300128 | T  | 0.41 | C  | 0.87 (0.05)  | 0.052 | 6.4E-80   | 1.09 (0.91-1.32) | 0.34    |
| 1   | <i>PLA2G2A/E</i>       | rs4655020   | 20167609 | G  | 0.41 | T  | -0.90 (0.05) | 0.052 | 2.5E-79   | 0.92 (0.76-1.12) | 0.42    |
| 1   | <i>PLA2G2A/E</i>       | rs13375942* | 20164965 | C  | 0.26 | T  | -0.99 (0.06) | 0.052 | 6.4E-79   | 1.08 (0.87-1.34) | 0.48    |
| 1   | <i>PLA2G5</i>          | rs11573219  | 20275354 | C  | 0.42 | T  | 0.87 (0.05)  | 0.051 | 4.6E-78   | 1.15 (0.95-1.38) | 0.15    |
| 1   | <i>PLA2G5</i>          | rs11573222  | 20275685 | A  | 0.41 | G  | 0.87 (0.05)  | 0.051 | 1.2E-77   | 1.15 (0.95-1.39) | 0.15    |
| 1   | <i>PLA2G2A</i>         | rs3753827   | 20178474 | A  | 0.45 | C  | -0.80 (0.05) | 0.050 | 4.9E-77   | 1.00 (0.83-1.22) | 0.96    |
| 1   | <i>PLA2G2A</i>         | rs12732308  | 20170906 | C  | 0.25 | A  | -0.98 (0.06) | 0.050 | 2.9E-76   | 1.05 (0.85-1.31) | 0.63    |
| 1   | <i>PLA2G2A/E</i>       | rs818968    | 20151992 | C  | 0.42 | T  | -0.89 (0.05) | 0.050 | 2.0E-75   | 0.96 (0.79-1.16) | 0.66    |
| 1   | <i>PLA2G2A/E</i>       | rs1796924   | 20154556 | T  | 0.42 | C  | -0.87 (0.05) | 0.049 | 8.4E-75   | 0.94 (0.78-1.14) | 0.53    |
| 1   | <i>PLA2G5</i>          | rs11573272  | 20286826 | G  | 0.40 | A  | 0.79 (0.05)  | 0.041 | 4.4E-62   | 1.16 (0.96-1.40) | 0.11    |
| 1   | <i>PLA2G5</i>          | rs11573185  | 20267988 | C  | 0.46 | A  | -0.75 (0.05) | 0.039 | 5.6E-59   | 0.90 (0.74-1.08) | 0.26    |
| 1   | <i>PLA2G5/2C/2D/2F</i> | rs6699362   | 20295686 | G  | 0.45 | T  | 0.65 (0.05)  | 0.028 | 3.3E-43   | 1.18 (0.98-1.43) | 0.08    |
| 1   | <i>PLA2G5</i>          | rs818678*   | 20238917 | T  | 0.39 | C  | -0.65 (0.05) | 0.026 | 9.1E-41   | 0.95 (0.78-1.15) | 0.58    |
| 1   | <i>PLA2G5/2A/2D/2F</i> | rs617363    | 20252732 | G  | 0.39 | A  | -0.65 (0.05) | 0.026 | 1.1E-40   | 0.95 (0.78-1.16) | 0.63    |
| 1   | <i>PLA2G5</i>          | rs656110    | 20269827 | C  | 0.42 | T  | -0.55 (0.05) | 0.021 | 2.4E-33   | 0.87 (0.72-1.05) | 0.15    |
| 1   | <i>PLA2G2E</i>         | rs4654897*  | 20064023 | C  | 0.26 | T  | 0.65 (0.06)  | 0.021 | 6.9E-33   | 1.05 (0.85-1.30) | 0.66    |
| 1   | <i>PLA2G5</i>          | rs3767227   | 20276642 | A  | 0.21 | G  | -0.71 (0.06) | 0.021 | 1.4E-32   | 0.99 (0.78-1.25) | 0.91    |
| 1   | <i>intergenic</i>      | rs4272591   | 20039928 | A  | 0.26 | G  | 0.64 (0.06)  | 0.021 | 3.3E-32   | 1.02 (0.82-1.26) | 0.87    |
| 1   | <i>OTUD3</i>           | rs3738122   | 20111447 | G  | 0.28 | C  | 0.60 (0.06)  | 0.020 | 1.6E-31   | 1.04 (0.84-1.28) | 0.73    |
| 1   | <i>PLA2G2A/E</i>       | rs12408941* | 20158074 | A  | 0.12 | G  | -0.79 (0.08) | 0.020 | 2.1E-31   | 1.02 (0.77-1.35) | 0.89    |
| 1   | <i>PLA2G5/2A/2D/2E</i> | rs1093661   | 20215090 | C  | 0.32 | A  | -0.51 (0.06) | 0.019 | 2.6E-30   | 0.89 (0.72-1.09) | 0.25    |
| 1   | <i>PLA2G2A</i>         | rs11677     | 20174551 | T  | 0.12 | C  | -0.78 (0.08) | 0.019 | 4.7E-30   | 1.00 (0.75-1.33) | 0.99    |
| 1   | <i>PLA2G5/2A/2E</i>    | rs12021819  | 20188642 | C  | 0.18 | A  | -0.71 (0.07) | 0.019 | 1.8E-29   | 1.00 (0.78-1.29) | 0.97    |
| 1   | <i>PLA2G2A/E</i>       | rs4655010   | 20160506 | A  | 0.28 | C  | -0.58 (0.06) | 0.018 | 1.7E-28   | 0.87 (0.70-1.08) | 0.19    |
| 1   | <i>PLA2G2A/E</i>       | rs17410800  | 20136488 | G  | 0.16 | A  | -0.72 (0.07) | 0.018 | 2.3E-28   | 1.14 (0.89-1.46) | 0.29    |
| 1   | <i>PLA2G5</i>          | rs11573238  | 20279173 | A  | 0.28 | G  | -0.59 (0.06) | 0.017 | 2.1E-27   | 0.94 (0.76-1.17) | 0.60    |
| 1   | <i>PLA2G5</i>          | rs11573221  | 20275668 | D  | 0.28 | I  | -0.58 (0.06) | 0.017 | 9.9E-27   | 0.94 (0.76-1.17) | 0.59    |
| 1   | <i>PLA2G5/2C/2D/2F</i> | rs492738*   | 20302448 | C  | 0.38 | A  | -0.47 (0.05) | 0.017 | 1.7E-26   | 1.00 (0.83-1.22) | 0.96    |
| 1   | <i>PLA2G5</i>          | rs12405285  | 20260195 | T  | 0.18 | C  | -0.66 (0.07) | 0.016 | 9.9E-26   | 0.97 (0.76-1.25) | 0.83    |
| 1   | <i>PLA2G5</i>          | rs11573191  | 20269002 | A  | 0.18 | G  | -0.66 (0.07) | 0.016 | 1.0E-25   | 0.96 (0.75-1.23) | 0.76    |
| 1   | <i>PLA2G2A/E</i>       | rs12132830  | 20151511 | A  | 0.11 | G  | -0.77 (0.08) | 0.015 | 2.4E-24   | 0.94 (0.69-1.29) | 0.70    |

|    |                                   |              |          |   |      |   |              |       |         |                  |      |
|----|-----------------------------------|--------------|----------|---|------|---|--------------|-------|---------|------------------|------|
| 1  | <i>PLA2G2A/E</i>                  | rs1093733    | 20131060 | T | 0.13 | C | -0.71 (0.08) | 0.015 | 6.3E-24 | 0.86 (0.64-1.16) | 0.33 |
| 1  | <i>intergenic</i>                 | rs818971     | 20149117 | C | 0.17 | A | -0.64 (0.07) | 0.014 | 5.7E-23 | 0.86 (0.65-1.12) | 0.25 |
| 1  | <i>PLA2G5/2A/2D/2F</i>            | rs12410635   | 20245978 | G | 0.28 | T | -0.50 (0.06) | 0.014 | 2.9E-22 | 0.94 (0.76-1.16) | 0.56 |
| 1  | <i>PLA2G2E</i>                    | rs3767218    | 20122364 | G | 0.13 | T | -0.67 (0.08) | 0.014 | 6.2E-22 | 0.89 (0.67-1.20) | 0.45 |
| 1  | <i>PLA2G2E/TMCO4/OTUD3/RNF186</i> | rs10737482   | 20046445 | T | 0.39 | C | 0.43 (0.05)  | 0.014 | 8.8E-22 | 1.11 (0.91-1.34) | 0.31 |
| 1  | <i>PLA2G2A/E</i>                  | rs1796918    | 20135518 | C | 0.17 | T | -0.61 (0.07) | 0.013 | 1.7E-21 | 0.85 (0.65-1.11) | 0.24 |
| 1  | <i>PLA2G2A/E</i>                  | rs7531863    | 20118295 | T | 0.24 | C | -0.54 (0.06) | 0.013 | 2.3E-21 | 1.01 (0.81-1.26) | 0.90 |
| 1  | <i>PLA2G2A/E</i>                  | rs818963     | 20156530 | T | 0.30 | C | -0.48 (0.06) | 0.012 | 2.0E-19 | 0.86 (0.70-1.06) | 0.16 |
| 1  | <i>PLA2G2A</i>                    | rs2236771    | 20177549 | C | 0.09 | G | -0.80 (0.09) | 0.012 | 1.3E-18 | 0.74 (0.51-1.09) | 0.13 |
| 1  | <i>PLA2G5</i>                     | rs11573260*  | 20282127 | T | 0.01 | C | 1.80 (0.22)  | 0.011 | 3.0E-18 | 0.96 (0.43-2.16) | 0.92 |
| 1  | <i>PLA2G2E</i>                    | rs3767219    | 20122193 | T | 0.10 | C | 0.68 (0.09)  | 0.011 | 3.0E-17 | 1.11 (0.82-1.50) | 0.50 |
| 1  | <i>PLA2G2E</i>                    | rs2233688*   | 20123317 | C | 0.11 | T | 0.63 (0.09)  | 0.010 | 8.7E-17 | 1.32 (1.00-1.74) | 0.05 |
| 1  | <i>PLA2G5</i>                     | rs11573298   | 20290794 | T | 0.20 | G | -0.52 (0.07) | 0.009 | 5.5E-15 | 0.99 (0.78-1.26) | 0.95 |
| 1  | <i>PLA2G2E/TMCO4/OTUD3/RNF186</i> | rs4509550    | 20030828 | C | 0.40 | T | -0.31 (0.05) | 0.007 | 2.1E-12 | 0.94 (0.77-1.15) | 0.55 |
| 1  | <i>OTUD3</i>                      | rs10916668   | 20105673 | A | 0.07 | G | -0.63 (0.10) | 0.007 | 8.5E-12 | 0.75 (0.50-1.15) | 0.19 |
| 1  | <i>OTUD3</i>                      | rs10492999   | 20110347 | G | 0.07 | A | -0.63 (0.10) | 0.007 | 8.8E-12 | 0.75 (0.49-1.15) | 0.19 |
| 1  | <i>PLA2G5/2C/2D/2F/UBXN10</i>     | rs12722987*  | 20327807 | A | 0.17 | C | -0.38 (0.07) | 0.007 | 1.2E-11 | 0.88 (0.68-1.15) | 0.36 |
| 1  | <i>PLA2G5/2A/2E/OTUD3</i>         | rs12568139*  | 20184263 | G | 0.07 | A | -0.72 (0.11) | 0.007 | 1.7E-11 | 0.88 (0.59-1.32) | 0.54 |
| 1  | <i>PLA2G2E</i>                    | rs1108974    | 20121296 | G | 0.12 | A | 0.53 (0.08)  | 0.007 | 1.8E-11 | 1.13 (0.85-1.49) | 0.40 |
| 1  | <i>PLA2G5</i>                     | rs606980     | 20267300 | A | 0.11 | G | -0.55 (0.09) | 0.007 | 2.3E-11 | 0.97 (0.71-1.32) | 0.85 |
| 1  | <i>PLA2G5/2C/2D/2F/UBXN10</i>     | rs12725043   | 20329927 | G | 0.17 | A | -0.37 (0.07) | 0.006 | 4.4E-11 | 0.90 (0.69-1.17) | 0.43 |
| 1  | <i>OTUD3</i>                      | rs12116837   | 20102615 | A | 0.05 | C | -0.73 (0.12) | 0.006 | 8.7E-11 | 0.64 (0.38-1.08) | 0.09 |
| 1  | <i>PLA2G5/2C/2D/2F/UBXN10</i>     | rs656755     | 20296754 | A | 0.17 | C | -0.32 (0.07) | 0.006 | 1.0E-09 | 0.94 (0.73-1.21) | 0.65 |
| 1  | <i>OTUD3</i>                      | rs17401735*  | 20109318 | G | 0.18 | A | -0.37 (0.07) | 0.006 | 1.2E-09 | 1.11 (0.88-1.41) | 0.37 |
| 17 | <i>ABCA8</i>                      | rs34931250*† | 64391522 | T | 0.05 | C | 0.59 (0.12)  | 0.005 | 3.1E-09 | 0.91 (0.58-1.41) | 0.67 |
| 1  | <i>PLA2G2E/TMCO4/OTUD3/RNF186</i> | rs12137940   | 20037970 | A | 0.08 | C | -0.52 (0.10) | 0.005 | 4.0E-09 | 0.75 (0.49-1.13) | 0.17 |
| 1  | <i>PLA2G5/2C/2D/2F/UBXN10</i>     | rs623784     | 20325021 | C | 0.25 | T | -0.32 (0.06) | 0.005 | 4.5E-09 | 0.89 (0.72-1.12) | 0.32 |
| 1  | <i>intergenic</i>                 | rs10917560   | 20057522 | G | 0.18 | T | -0.38 (0.07) | 0.005 | 4.1E-08 | 1.06 (0.83-1.35) | 0.65 |
| 1  | <i>PLA2G2E/TMCO4/OTUD3/RNF186</i> | rs7532822    | 20044471 | T | 0.20 | C | -0.38 (0.07) | 0.004 | 4.1E-08 | 1.00 (0.79-1.26) | 0.97 |
| 1  | <i>PLA2G2D</i>                    | rs17354769   | 20319988 | C | 0.07 | T | -0.48 (0.11) | 0.004 | 4.7E-08 | 0.91 (0.62-1.35) | 0.64 |

sPLA<sub>2</sub>-IIA indicates group IIA secretory phospholipases A<sub>2</sub>; Chr, chromosome, SNP, single-nucleotide polymorphism; BP, base pair position; A1, minor (effect) allele; MAF, minor allele frequency; A2, non-effect allele; SE, standard error; HR, hazard ration; and CI, confidence interval.  $\beta$ s and SEs were obtained from untransformed traits adjusted for age, sex, region and subpopulation stratification measures. *P* values were obtained from inverse-quantile normalized traits adjusted for age, sex, region, and subpopulation stratification measures. HRs were adjusted for drug allocation (P for interaction by drug allocation were all >0.05)

\* indicates independent SNPs based on  $r^2 < 0.1$  and 1Mbp distance; † indicates SNPs showing non-redundant signals from conditional GCTA analysis

**Supplemental Table VII.** Association of top three *PLA2G2A* variants with cardiovascular risk factors

| Characteristics           | rs11573156     |                | rs2307246      |                | rs4744         |                |
|---------------------------|----------------|----------------|----------------|----------------|----------------|----------------|
|                           | $\beta$ (SE)   | <i>P</i> Value | $\beta$ (SE)   | <i>P</i> Value | $\beta$ (SE)   | <i>P</i> Value |
| BMI, kg/m <sup>2</sup>    | 0.052 (0.099)  | 0.58           | 0.017 (0.099)  | 0.83           | 0.011 (0.099)  | 0.89           |
| SBP, mmHg                 | 0.070 (0.279)  | 0.84           | 0.012 (0.279)  | 0.99           | 0.049 (0.280)  | 0.90           |
| LDL-Cholesterol, mg/dl    | -0.347 (0.311) | 0.27           | -0.409 (0.312) | 0.29           | -0.396 (0.312) | 0.30           |
| HDL-Cholesterol, mg/dl    | 0.390 (0.252)  | 0.18           | 0.258 (0.253)  | 0.41           | 0.284 (0.253)  | 0.34           |
| Triglycerides, mg/dl      | -0.586 (1.284) | 0.68           | -0.090 (1.289) | 0.99           | -0.203 (1.290) | 0.95           |
| <sup>†</sup> hs-CRP, mg/L | -0.251 (0.141) | 0.22           | -0.211 (0.141) | 0.26           | -0.212 (0.141) | 0.29           |

BMI indicates body mass index; SBP, systolic blood pressure; LDL, low density lipoprotein; hs-CRP, high-sensitivity C-reactive protein; SE, standard error.  $\beta$ s and SEs were obtained from untransformed traits adjusted for age, sex, region and subpopulation stratification measures, and *P* values were obtained from inverse-quantile normalized traits adjusted for age, sex, region, and subpopulation stratification measures; <sup>†</sup> additionally adjusted for smoking status and BMI.

**Supplemental Table VIII.** Comparison between key factors relating to study design, population, and results between the current JUPITER study and a prior study in EPIC-Norfolk

|                                           | <b>JUPITER</b>                                                                                                                                                                                | <b>EPIC-Norfolk*</b>                                                                                                              |
|-------------------------------------------|-----------------------------------------------------------------------------------------------------------------------------------------------------------------------------------------------|-----------------------------------------------------------------------------------------------------------------------------------|
| <b>Study Design and Patient Selection</b> |                                                                                                                                                                                               |                                                                                                                                   |
|                                           | Prospective evaluation nested in a completed randomized controlled trial among participants without a history of cardiovascular disease who had elevated hsCRP levels and low LDL cholesterol | Nested case-control study among apparently healthy individuals                                                                    |
| <b>Sample Size</b>                        |                                                                                                                                                                                               |                                                                                                                                   |
|                                           | 11,269 individuals with baseline sPLA2-IIA measures (9,620 also with follow-up measures at 1-year); a total of 313 incident cardiovascular disease events occurred during follow-up           | 1,105 cases with fatal or nonfatal coronary arterial disease and 2209 controls (age/sex/enrollment time-matched)                  |
| <b>Patient Demographics</b>               |                                                                                                                                                                                               |                                                                                                                                   |
| Age (median years)                        | 66                                                                                                                                                                                            | 64                                                                                                                                |
| Proportion female (%)                     | 37                                                                                                                                                                                            | 42                                                                                                                                |
| sPLA2-IIA (median ng/mL)                  | 3.81                                                                                                                                                                                          | 8.5 (controls) and 9.5 (cases)                                                                                                    |
| <b>Risk Associations</b>                  |                                                                                                                                                                                               |                                                                                                                                   |
| Follow-up (median, years)                 | 1.9                                                                                                                                                                                           | 6.0                                                                                                                               |
| Risk Estimate                             | Adjusted (including for hsCRP) HR (95% CI; p-trend) = 1.43 (1.01-2.03; P linear trend = 0.03) for individuals in the highest vs lowest sPLA2 quartile                                         | Adjusted OR (95% CI; p-trend) = 1.34 (1.02, 1.71; P linear trend = 0.03) for individuals in the highest vs lowest sPLA2 quartile. |

\*Boekholdt *et al. Arterioscler Thromb Vasc Biol.* 2005;25:839-846.
